# Supplementary material for: Regulation of Rab5 isoforms by transcriptional and post‐transcriptional mechanisms in yeast
Source: PubMed Central journal article supplement (PMC5637908; doi:10.1002/1873-3468.12785), 2017-08-24
Supplement: FEB2-591-2803-s002.pdf [file FEB2-591-2803-s002.pdf]

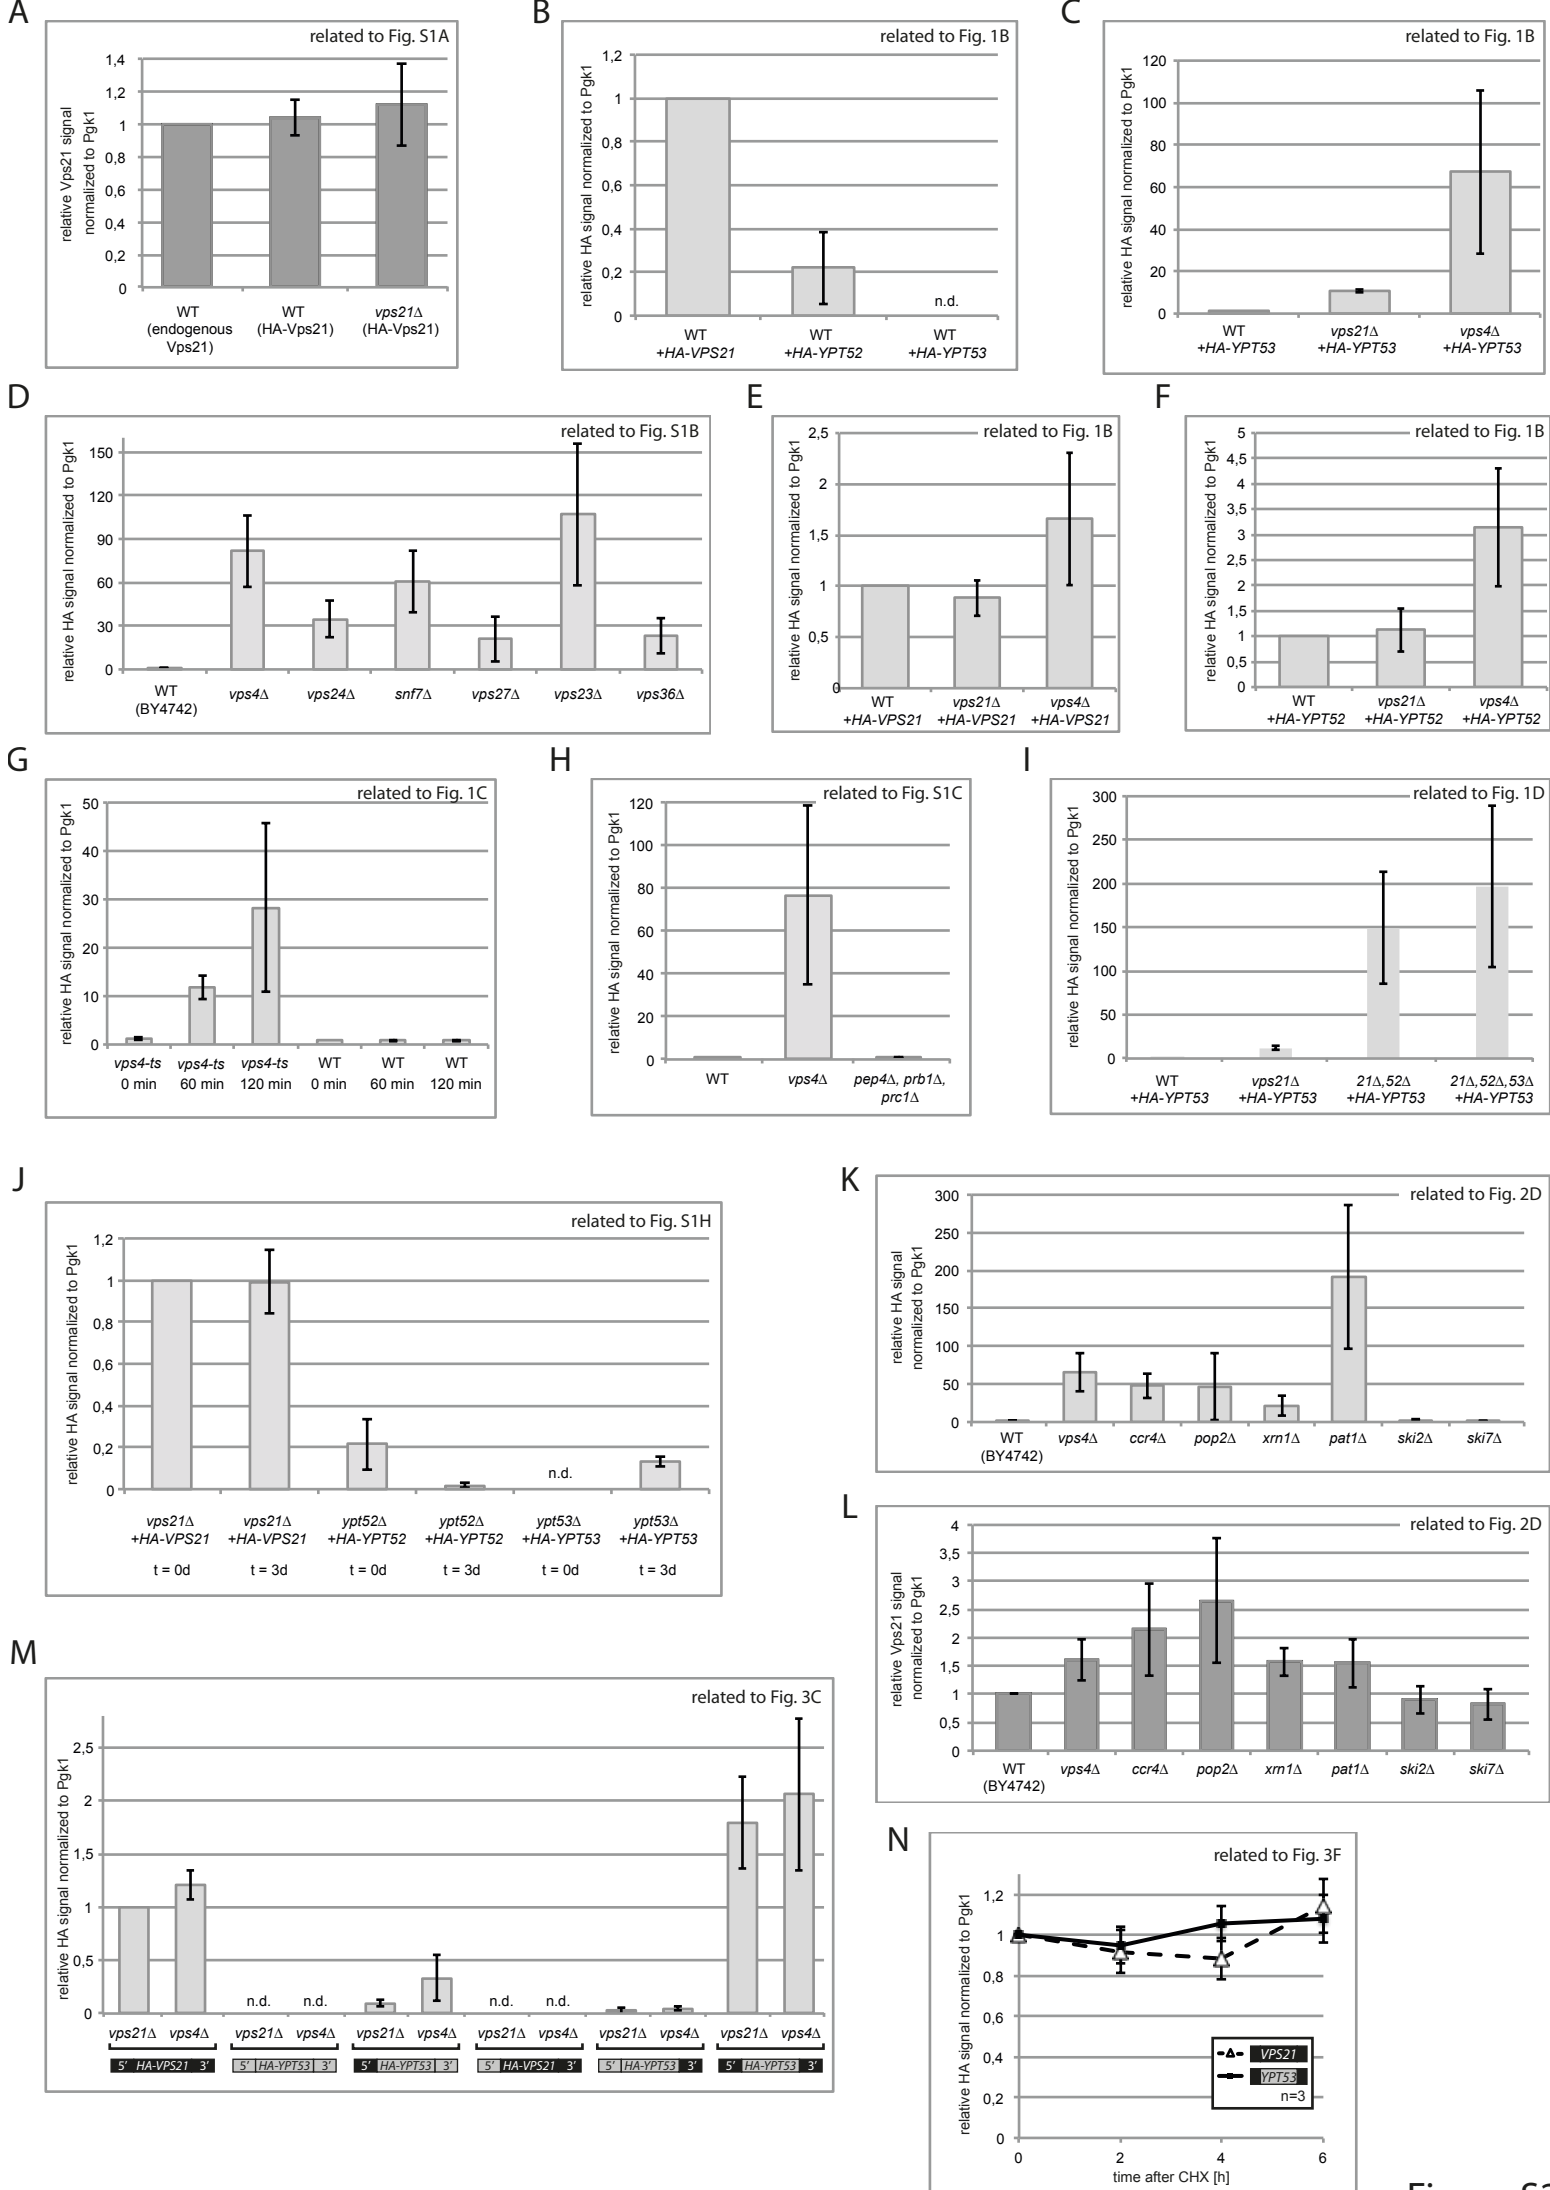

Figure S2
