# Supplementary material for: Regulation of Rab5 isoforms by transcriptional and post‐transcriptional mechanisms in yeast
Source: PubMed Central journal article supplement (PMC5637908; doi:10.1002/1873-3468.12785), 2017-08-24
Supplement: FEB2-591-2803-s004.pdf [file FEB2-591-2803-s004.pdf]

**Table 1: List of yeast strains and plasmids**

| strain name | genotype                                                              | reference                |
|-------------|-----------------------------------------------------------------------|--------------------------|
| SEY6210     | <i>MATalpha leu2-3, 112 ura3-52 his3-200 trp1-901 lys2-801 suc2-9</i> | Robinson et al., 1988    |
| SEY6210.1   | <i>MATa leu2-3, 112 ura3-52 his3-200 trp1-901 lys2-801 suc2-9</i>     | Robinson et al., 1988    |
| MBY3        | SEY6210 <i>vps4::TRP1</i>                                             | Babst et al., 1997       |
| MBY4        | SEY6210.1 <i>vps4::TRP1</i>                                           | Babst et al., 1997       |
| MPY93       | SEY6210 <i>vps21::HIS3</i>                                            | Horazdovsky et al., 1997 |
| DTY515      | SEY6210.1 <i>vps21::HIS3</i>                                          | this study               |
| MPY96       | SEY6210.1 <i>vps4::TRP1, vps21::HIS3</i>                              | this study               |
| MPY99       | SEY6210.1 <i>ypt52::HIS3</i>                                          | this study               |
| MPY100      | SEY6210.1 <i>vps4::TRP1, ypt52::HIS3</i>                              | this study               |
| DTY508      | SEY6210.1 <i>ypt53::HIS3</i>                                          | this study               |
| DTY509      | SEY6210.1 <i>vps4::TRP1, ypt53::HIS3</i>                              | this study               |
| DTY514      | SEY6210.1 <i>vps21::HIS3, ypt52::HIS3, ypt53::HIS3</i>                | this study               |
| DTY518      | SEY6210.1 <i>vps21::HIS3, ypt52::HIS3</i>                             | this study               |
| DTY516      | SEY6210 <i>vps21::HIS3, ypt52::HIS3, ypt53::HIS3</i>                  | this study               |
| MPY101      | SEY6210 <i>vps21::HIS3, ypt52::HIS3</i>                               | this study               |
| MPY99       | SEY6210.1 <i>ypt52::HIS3</i>                                          | this study               |
| DTY508      | SEY6210.1 <i>ypt53::HIS3</i>                                          | this study               |
| MMY10       | SEY6210.1 <i>MUP1-GFP::HIS3</i>                                       | this study               |
| SSY1        | SEY6210.1 <i>vps9::HIS3</i>                                           | this study               |
| TVY614      | SEY6210 <i>pep4::LEU2; prc1::HIS3; prb1::HisG</i>                     | Gerhardt et al., 1998    |
| BY4742      | <i>MATalpha his3Δ 1; leu2Δ 0; lys2Δ 0; ura3Δ 0</i>                    | Brachmann et al., 1998   |
| OSY023      | BY4742; <i>vps4::KanMX4</i>                                           | Open Biosystems          |
| OSY021      | BY4742; <i>vps24::KanMX4</i>                                          | Open Biosystems          |
| OSY022      | BY4742; <i>snf7::KanMX4</i>                                           | Open Biosystems          |
| OSY018      | BY4742; <i>vps27::KanMX4</i>                                          | Open Biosystems          |
| OSY019      | BY4742; <i>vps23::KanMX4</i>                                          | Open Biosystems          |
| OSY020      | BY4742; <i>vps36::KanMX4</i>                                          | Open Biosystems          |
| OSY182      | BY4742; <i>crz1::KanMX4</i>                                           | Euroscarf                |
| OSY430      | BY4742; <i>gis1::KanMX4</i>                                           | Open Biosystems          |
| OSY480      | BY4738 (BY4742 <i>HIS3</i> <sup>+</sup> ); <i>vps8::KanMX4</i>        | Open Biosystems          |
| OSY389      | BY4742; <i>ccr4::KanMX4</i>                                           | Open Biosystems          |
| OSY390      | BY4742; <i>pop2::KanMX4</i>                                           | Open Biosystems          |
| OSY388      | BY4742; <i>xm1::KanMX4</i>                                            | Open Biosystems          |
| MFY01       | BY4742; <i>pat1::KanMX4</i>                                           | Open Biosystems          |
| OSY384      | BY4742; <i>ski2::KanMX4</i>                                           | Open Biosystems          |
| OSY385      | BY4742; <i>ski7::KanMX4</i>                                           | Open Biosystems          |

| plasmid name | genotype                                                           | reference                 |
|--------------|--------------------------------------------------------------------|---------------------------|
| pRS413       | empty centromeric vector <i>HIS3</i>                               | Sikorski and Hieter, 1989 |
| pRS414       | empty centromeric vector <i>TRP1</i>                               | Sikorski and Hieter, 1989 |
| pRS415       | empty centromeric vector <i>LEU2</i>                               | Sikorski and Hieter, 1989 |
| pRS416       | empty centromeric vector <i>URA3</i>                               | Sikorski and Hieter, 1989 |
| pOS139       | pRS416 - <i>GFP-VPS21</i> (endogenous 5' and 3')                   | this study                |
| pMP29        | pRS416 - <i>GFP-YPT52</i> (endogenous 5' and 3')                   | this study                |
| pOS079       | pRS416 - <i>GFP-YPT53</i> (endogenous 5' and 3')                   | this study                |
| pOS031       | pRS415 - <sup>TDH3</sup> <i>GFP-CPS</i>                            | this study                |
| pMP8         | pRS416 - <i>3xHA-VPS21</i> (endogenous 5' and 3')                  | this study                |
| pMP9         | pRS416 - <i>3xHA-YPT52</i> (endogenous 5' and 3')                  | this study                |
| pMP16        | pRS416 - <i>3xHA-YPT53</i> (endogenous 5' and 3')                  | Müller et al., 2015       |
| pMA42        | pRS415 - <i>vps4-ts</i>                                            | Adell et al., 2014        |
| pMB4         | pRS413 - <i>VPS4</i>                                               | Babst et al., 1997        |
| pOS014       | pRS415 - <i>VPS4</i>                                               | Müller et al., 2015       |
| pOS015       | pRS415 - <i>vps4</i> <sup>E233Q</sup>                              | Adell et al., 2014        |
| pOS065       | pRS416 - <sup>5' VPS21</sup> <i>3xHA-YPT53</i> <sup>3' YPT53</sup> | this study                |
| pOS069       | pRS416 - <sup>5' YPT53</sup> <i>3xHA-YPT53</i> <sup>3' VPS21</sup> | this study                |
| pOS066       | pRS416 - <sup>5' YPT53</sup> <i>3xHA-VPS21</i> <sup>3' VPS21</sup> | this study                |
| pMF01        | pRS416 - <sup>5' VPS21</sup> <i>3xHA-VPS21</i> <sup>3' YPT53</sup> | this study                |
| pOS068       | pRS416 - <sup>5' VPS21</sup> <i>3xHA-YPT53</i> <sup>3' VPS21</sup> | this study                |
| pCHL642      | pRS416 - <i>MUP1-GFP</i>                                           | Lin et al., 2008          |
| pMM02        | pRS415 - <i>MUP1-GFP</i>                                           | this study                |
| pMP30        | pRS416 - <sup>TDH3</sup> <i>SH-VPS21</i>                           | this study                |
| pMP31        | pRS416 - <sup>TDH3</sup> <i>SH-YPT53</i>                           | this study                |
