# Supplementary material for: Regulation of Rab5 isoforms by transcriptional and post‐transcriptional mechanisms in yeast
Source: PubMed Central journal article supplement (PMC5637908; doi:10.1002/1873-3468.12785), 2017-08-24
Supplement: FEB2-591-2803-s005.pdf [file FEB2-591-2803-s005.pdf]

**Table S2: Primer sequences**

| primer name:            | sequence:                                                 |
|-------------------------|-----------------------------------------------------------|
| <b>VPS21 constructs</b> |                                                           |
| Xho1 Prom Ypt51 fw      | gagactcgagGAGTAGAAGATACAGAGATGACTTG                       |
| Hind3UTR Ypt51 rev      | tctcaagcttCAATATTAAC TAATCCATCTCCCGA                      |
| YPT51-HA rev            | TCAGGAACATCGTATGGGTACATTTTTTTTGTGTGATAAAAAGGG             |
| YPT51-HA fw             | CCCTTTTATCACACAAAAAATGTACCCATACGATGTTCCCTGA               |
| HA-51rev                | GAAGTGACTGATGTGTTTCATAGCGTAATCTGGAACGTCAT                 |
| HA-51 fw                | ATGACGTTCCAGATTACGCTATGAACACATCAGTCAC TTC                 |
| VPS21-orf_EcoRI-F       | cgcggaattcATGAACACATCAGTCAC                               |
| VPS21-orf_HindIII-R     | gcgcaagcttCTAACAACTGCAAGCACTG                             |
| Prom21-GFP-F            | CCCTTTTATCACACAAAAAATGAAAGGAGAAGAAC TTTTCACTGG            |
| Prom21-GFP-R            | CCAGTGAAAAGTTCTTCTCCTTTTCATTTTTTTTGTGTGATAAAAAGGG         |
| VPS21-3'utr-NotI-R      | cgcGCGGCCGCAATATTAAC TAATCCATCTCCCGATTTTCG                |
| <b>YPT52 constructs</b> |                                                           |
| Not1 Prom Ypt52 fw      | gcgcgcggccgcCTGGTAATAACGTCAATACGTACTCTCTTG                |
| HindIII UTR Ypt52 rev   | gctcaagcttGCATGGTAAATAGGGTGAACG                           |
| HA fw (GS) Ypt52        | GGAGTAAACGTATATATTTATTAACAGATGTACCCATACGATGTTCCCTG        |
| HA rev (GS) Ypt52       | CCCAATAAAACTAGTTTAAATTTGCAACATAGCGTAATCTGGAACGTCATATGG    |
| Prom Ypt52 rev (GS) HA  | CAGGAACATCGTATGGGTACATCTGTTAATAATATATACGTTTACTCC          |
| Ypt52 fw (GS) HA        | CCATATGACGTTCCAGATTACGCTATGTTGCAATTTAAACTAGTTTTATTGGG     |
| Ypt52 fw (GS) GFP       | GGCATGGATGAACTATACAAAATGTTGCAATTTAAACTAGTTTTATTGGGTG      |
| GFP Ypt52 Fw (GS)       | GGAGTAAACGTATATATTTATTAACAGatgAGTAAAGGAGAAGAAC TTTTCACTGG |
| GFP Ypt52 rev (GS)      | CACCCAATAAAACTAGTTTAAATTTGCAACATTTTGTATAGTTCATCCATGCC     |
| Prom Ypt52 GFP (GS) rev | CCAGTGAAAAGTTCTTCTCCTTTACTcatCTGTTAATAATATATACGTTTACTCC   |

|                                           |                                                                     |
|-------------------------------------------|---------------------------------------------------------------------|
| <b>YPT53 constructs</b>                   |                                                                     |
| EcoR1 Prom Ypt53 fw                       | ccccgaattcAGAATTAGGGAGAAGTATTCAAAC                                  |
| Not1 UTR ypt53 rev                        | GGGGgcgccgcGCCTTGTGATTCTCGATCTGGCGAT                                |
| promYpt53(HA)rev 2                        | GGAACATCGTATGGGTACATTCTACTTAACTTCGATGCTG                            |
| HAtagFW GS HAYpt53 3                      | CAGCATCGAAGTTAAGTAGAATGTACCCATACGATGTTCC                            |
| HAtagREV GS HAYpt53 4                     | TGTTGGAATAGCTGCTGTATGTTTATCAGCGTAATCTGGAACGTCATATGG                 |
| YPT53 FW GS (HA Ypt53) 5                  | CCATATGACGTTCCAGATTACGCTGATAAACATACAGCAGCTATTCCAACA                 |
| utr_ypt53-GFP fw                          | GCATCGAAGTTAAGTAGAatgAGTAAAGGAGAAGAAC                               |
| GFP-YPT53-rev                             | GGAATAGCTGCTGTATGTTTATCCATTTTGTATAGTTCATCCATGCC                     |
| GFP-YPT53-fw                              | GGCATGGATGAACTATACAAAATGGATAAACATACAGCAGCTATTCC                     |
| utr_ypt53-GFP rev                         | GTTCTTCTCCTTTACTcatTCTACTTAACTTCGATGC                               |
| YPT53-orf-EcoRI-F                         | agctaagaattcATGGATAAACATACAGCAGCTATTCC                              |
| YPT53-orf-EcoRI-F                         | tgcagtaagcttTAGCAGTTACAACCCCCAG                                     |
| <b>chimeric constructs</b>                |                                                                     |
| Prom.VPS21-HA53_ F                        | CCCTTTTATCACACAAAAAATGTACCCATACGATGTTCCCTG                          |
| Prom.VPS21-HA53_ R                        | CAGGAACATCGTATGGGTACATTTTTTTTGTGTGATAAAAGGG                         |
| Prom.YPT53-HA21_ F                        | CCATATGACGTTCCAGATTACGCTAACACATCAGTCACTTCCATAAAGTTGG                |
| Prom.YPT53-HA21_ R                        | CCAACTTTATGGAAGTGACTGATGTGTTAGCGTAATCTGGAACGTCATATGG                |
| YPT53-T(VPS21)_F                          | GGGAGACTGGGGGTTGTAAC TGCTAGAGAGGGGAAAATAAATATATATAAAAAAAGTC         |
| YPT53-T(VPS21)_R                          | GACTTTTTTTTTATATATATTTATTTTCCCCCTCTCTAGCAGTTACAACCCCCAGTCTCCC       |
| VPS21-T(YPT53)_F                          | GCAAACAGTGCTTGCAGTTGTTAGACTGCAAGCAAACAACAGCAAACG                    |
| VPS21-T(YPT53)_R                          | CGTTTGCTGTTGTTTTGCTTGCAGTCTAACAAC TGCAAGCACTGTTTGC                  |
| <b>gene deletions/chromosomal tagging</b> |                                                                     |
| ypt53_KO_F1                               | AGAATGGATAAACATACAGCAGCTATTCCAACATTAAC TATCAAACggatccccggggttaattaa |
| ypt53_KO_R1                               | CAATAGTAGGTTCTTTGCTCTCTTTAAAATCGTCAGATACAAACCgaattcgagctcgtttaaac   |
| ypt52 KO F1                               | CAGATGTTGCAATTTAAACTAGTTTTATTTGGGTGACTCATCCGTGcggatccccggggttaattaa |

|              |                                                                   |
|--------------|-------------------------------------------------------------------|
| ypt52 KO R1  | GATTGATTGAGATAAAAAAGCAGCACCAATCGTACTTTCACGTAGGaatcgcgctcgtttaaac  |
| MUP1 Flag F1 | AATATAATCGAACATTACAAAAGTGAACAAGAAAAATCGCTGTACcggatccccgggtaattaa  |
| MUP1 Flag R1 | ATAAAGAAAATGCAATTATAAGAATGTTTCATACGTGATTATAAGAgaatcgcgctcgtttaaac |
| VPS9_KO_F    | TTTCTCTTCATCAAACAACAAAGAACAGGAATCAACAGCCCGGATCCCCGGGTTAATTAA      |
| VPS9_KO_R    | TAACTTTTCCATACCTTCCTTGGCATTTCATCTTGGAAGAATTCGAGCTCGTTTAAAC        |
